# Supplementary material for: Synthesis and Biological Evaluation of Hydroxylated Monocarbonyl Curcumin Derivatives as Potential Inducers of Neprilysin Activity
Source: MDPI journal article supplement (doi:10.3390/biomedicines9080955), 2021-08-03
Supplement: s1 [file s1]

# **Synthesis and Biological Evaluation of Hydroxylated Monocarbonyl Curcumin Derivatives as Potential Inducers of Neprilysin Activity**

**Dimitris Matiadis<sup>1</sup>, See-Ting Ng<sup>2</sup>, Eric H.-L. Chen<sup>2</sup>, Georgia Nigianni<sup>1,3</sup>, Veroniki P. Vidali<sup>3</sup>, Aleksander Canko<sup>3</sup>, Rita P.-Y. Chen<sup>2,4,5,\*</sup> and Marina Sagnou<sup>1,\*</sup>**

<sup>1</sup>NCSR "Demokritos", Institute of Biosciences & Applications, Patr. Grigoriou & Neapoleos 27, Athens, 153 41, Greece

<sup>2</sup>Institute of Biological Chemistry, Academia Sinica, No. 128, Sec. 2, Academia Rd., Nankang, Taipei 115, Taiwan

<sup>3</sup>NCSR "Demokritos", Institute of Nanoscience & Nanotechnology, Patr. Grigoriou & Neapoleos 27, Athens, 153 41, Greece

<sup>4</sup>Institute of Biochemical Sciences, National Taiwan University, No. 1, Sec. 4, Roosevelt Rd., Taipei 106, Taiwan

<sup>5</sup>Neuroscience Program of Academia Sinica No. 128, Sec. 2, Academia Rd., Nankang, Taipei 115, Taiwan

## **Supporting Information**

### **Contents**

NMR spectra

2

## NMR spectra

*(1E,4E)*-1,5-bis(4-hydroxyphenyl)penta-1,4-dien-3-one **1**

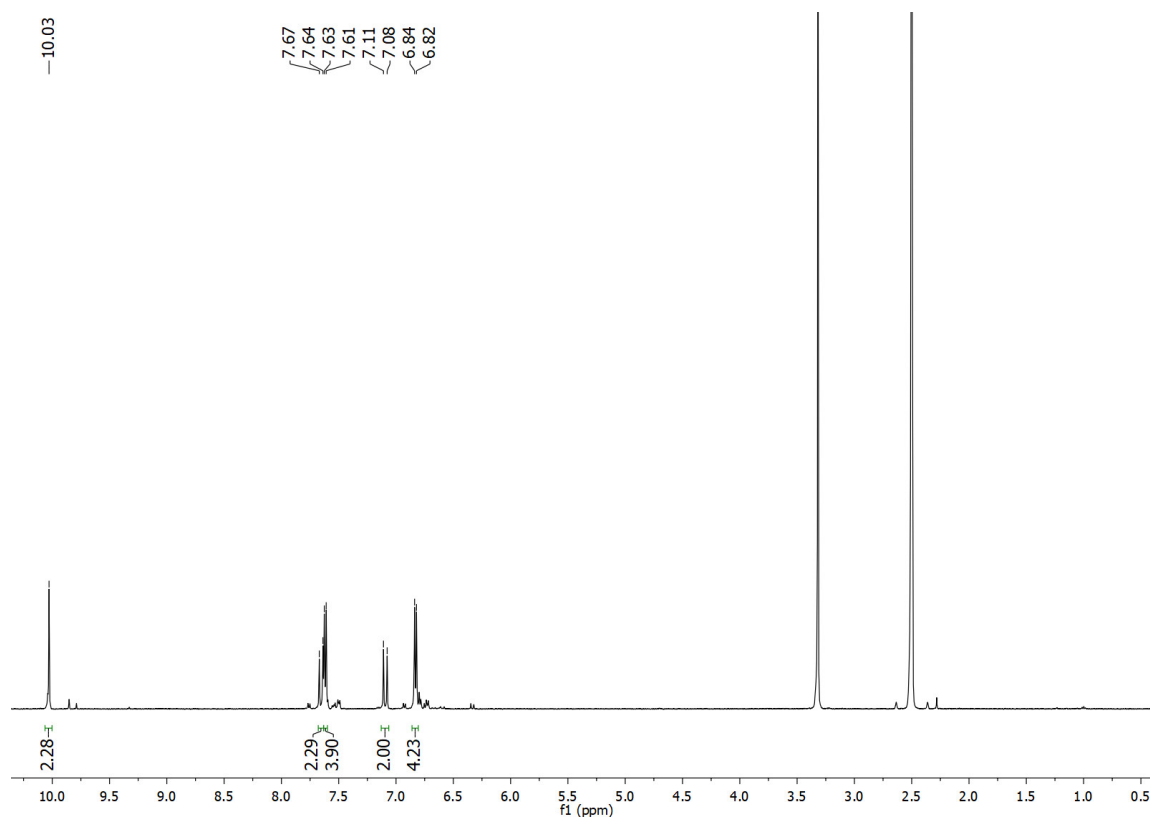

**Figure S1.**  $^1\text{H}$  NMR spectrum (500 MHz,  $\text{DMSO}-d_6$ ,  $\delta$  ppm)

*(1E,4E)-1,5-bis(4-hydroxy-3-methoxyphenyl)penta-1,4-dien-3-one 2*

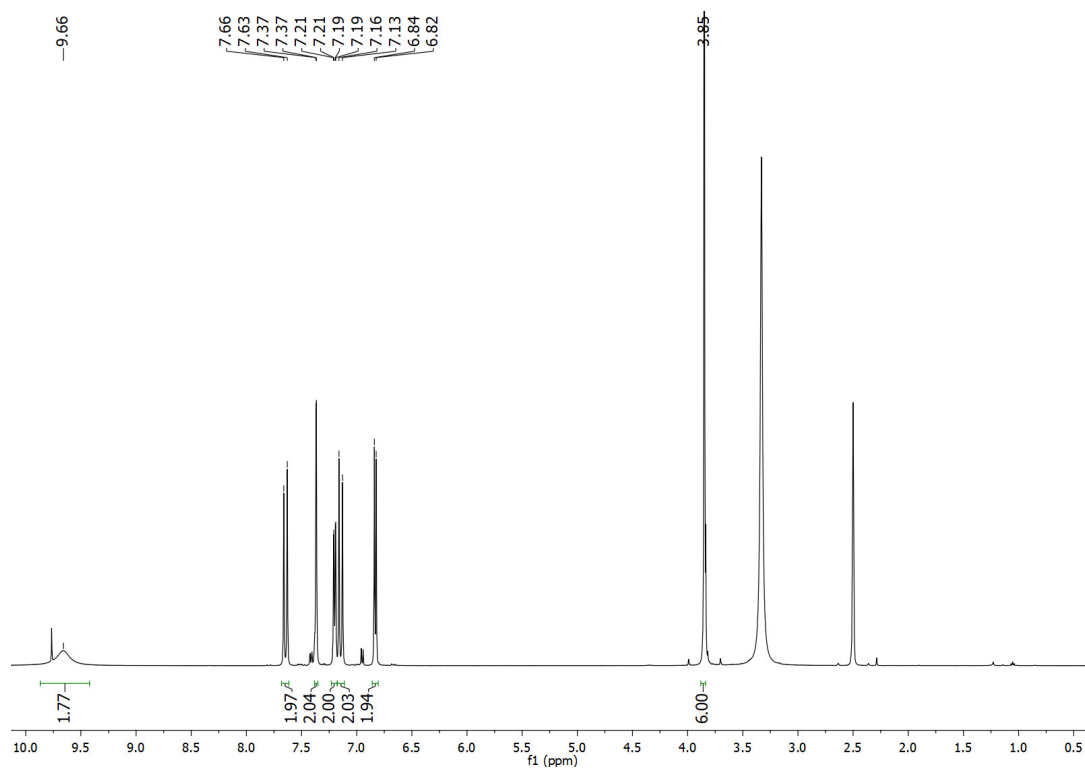

**Figure S2.** <sup>1</sup>H NMR spectrum (500 MHz, DMSO-*d*<sub>6</sub>, δ ppm)

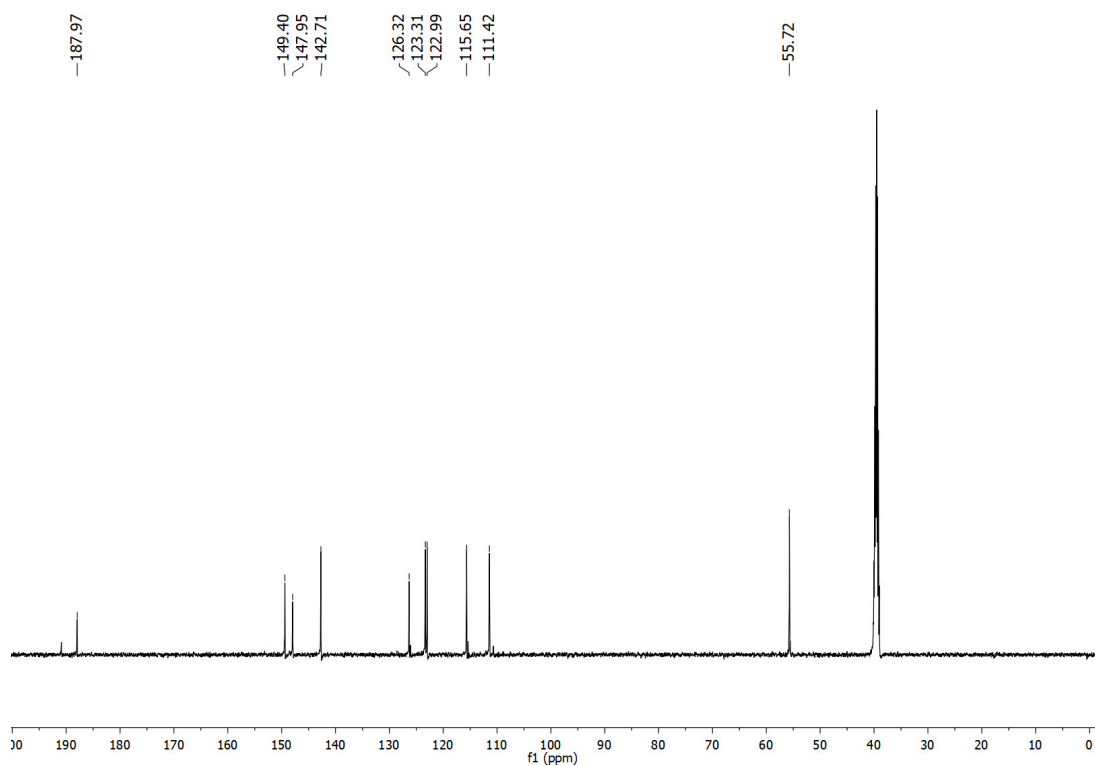

**Figure S3.**  $^{13}\text{C}$  NMR spectrum (125 MHz, DMSO- $d_6$ ,  $\delta$  ppm)

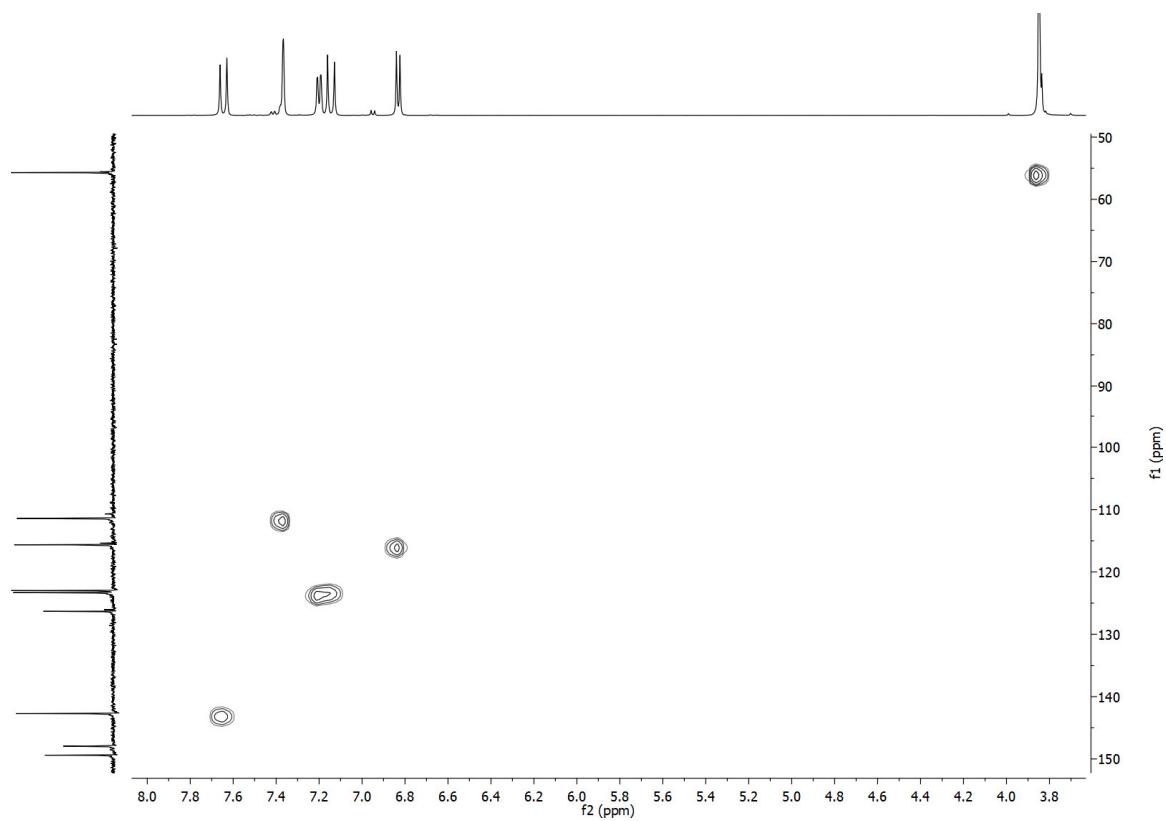

**Figure S4.**  $^1\text{H}$ - $^{13}\text{C}$  HSQC spectrum

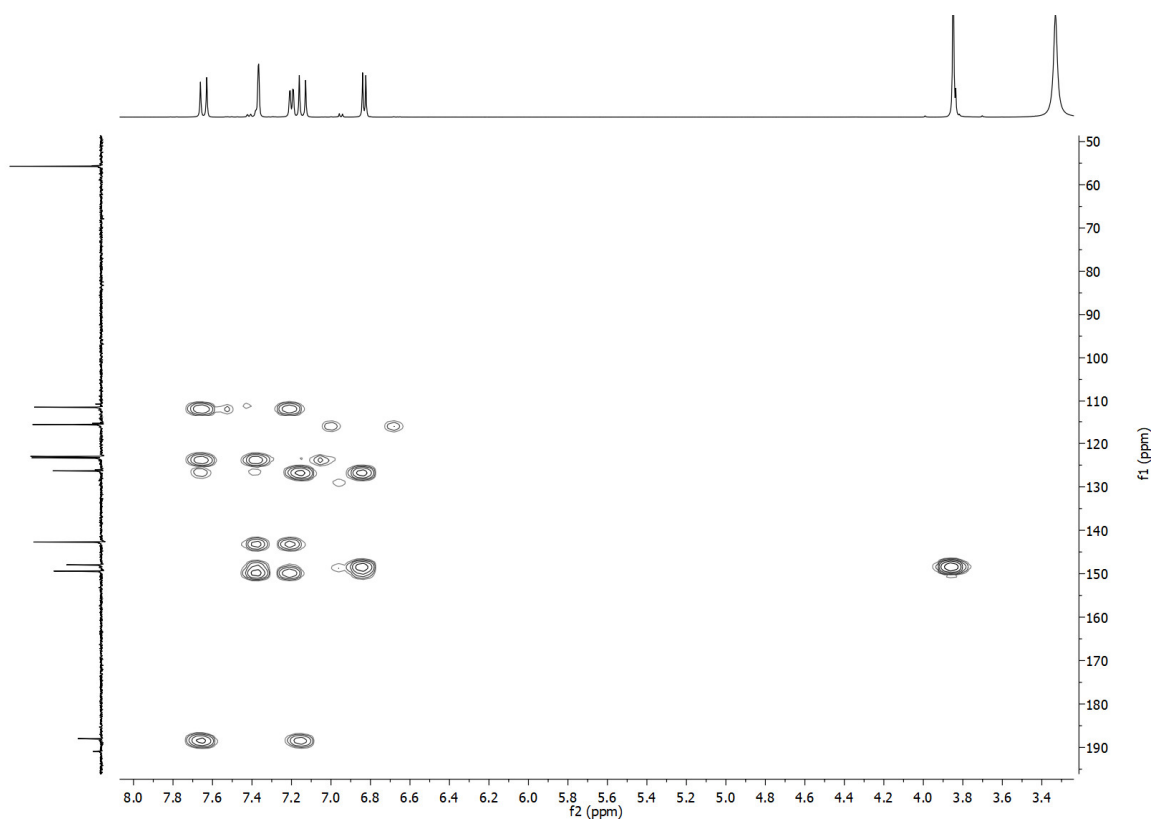

**Figure S5.  $^1\text{H}$ - $^{13}\text{C}$  HMBC spectrum**

*2,6-bis((E)-4-hydroxybenzylidene)cyclohexan-1-one 3*

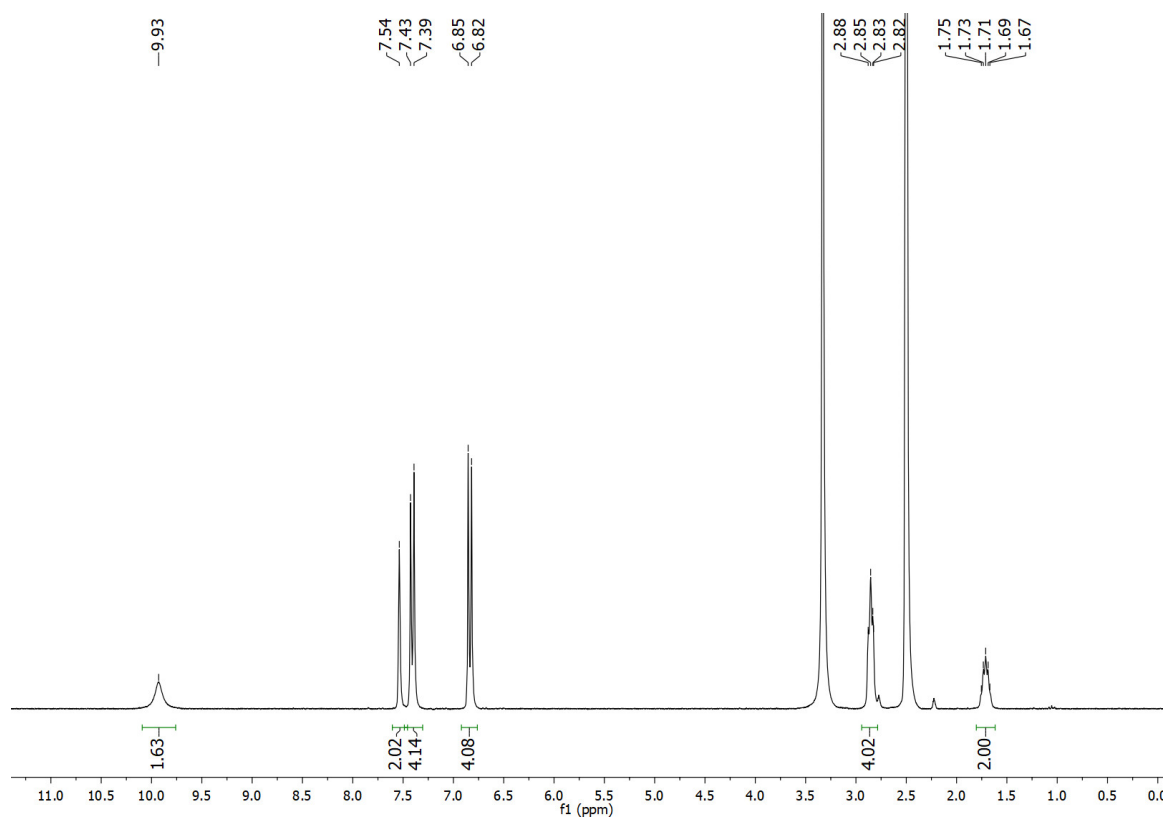

**Figure S6.**  $^1\text{H}$  NMR spectrum (500 MHz,  $\text{DMSO-}d_6$ ,  $\delta$  ppm)

*2,6-bis((E)-4-hydroxy-3-methoxybenzylidene)cyclohexan-1-one* **4**

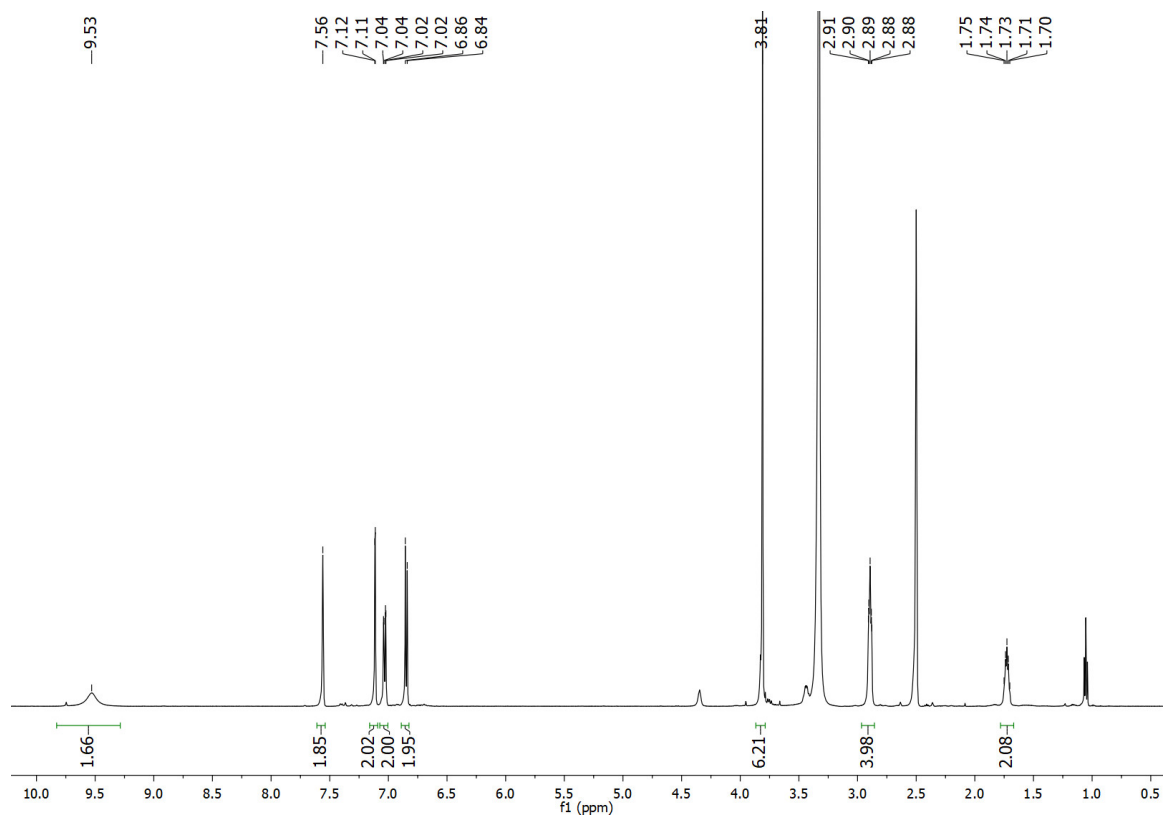

**Figure S7.**  $^1\text{H}$  NMR spectrum (500 MHz,  $\text{DMSO}-d_6$ ,  $\delta$  ppm)

*(1E,4E)*-1,5-bis(3,4-dihydroxyphenyl)penta-1,4-dien-3-one **8**

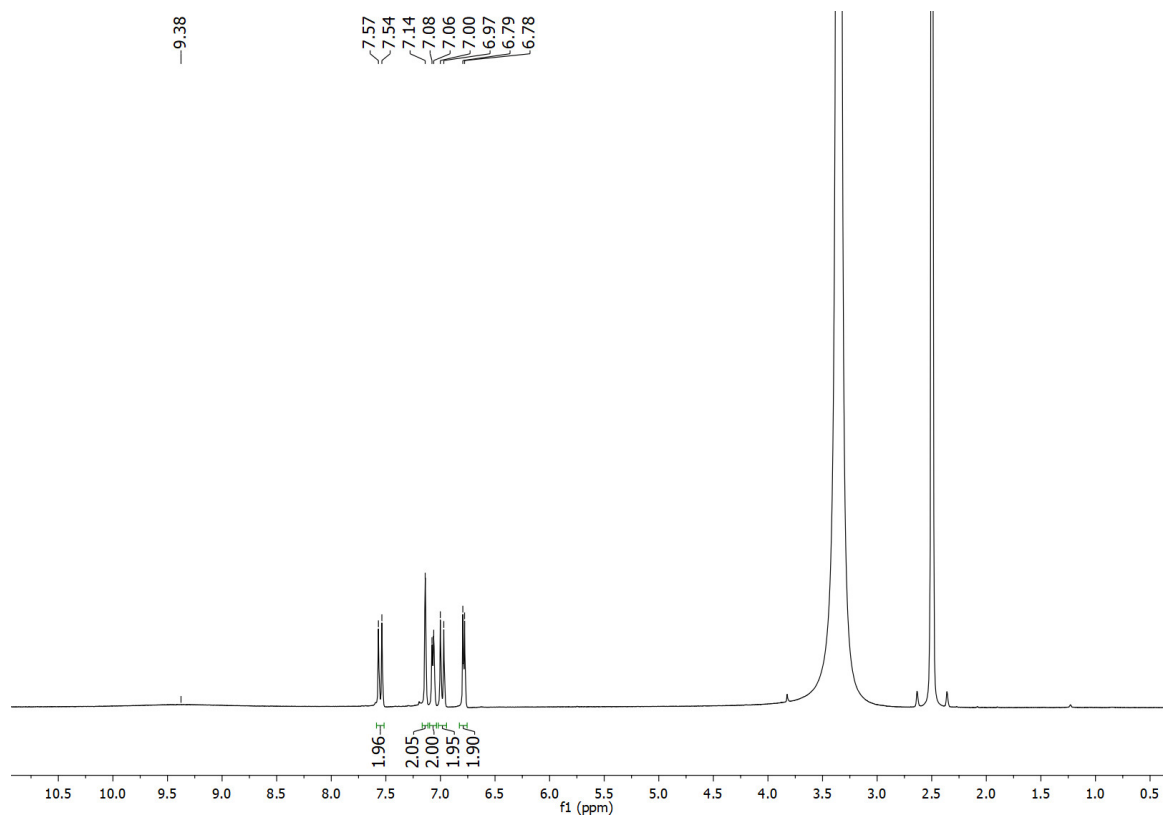

**Figure S8.**  $^1\text{H}$  NMR spectrum (500 MHz,  $\text{DMSO-}d_6$ ,  $\delta$  ppm)

*(2E,6E)*-2,6-bis(3,4-dihydroxybenzylidene)cyclohexanone **9**

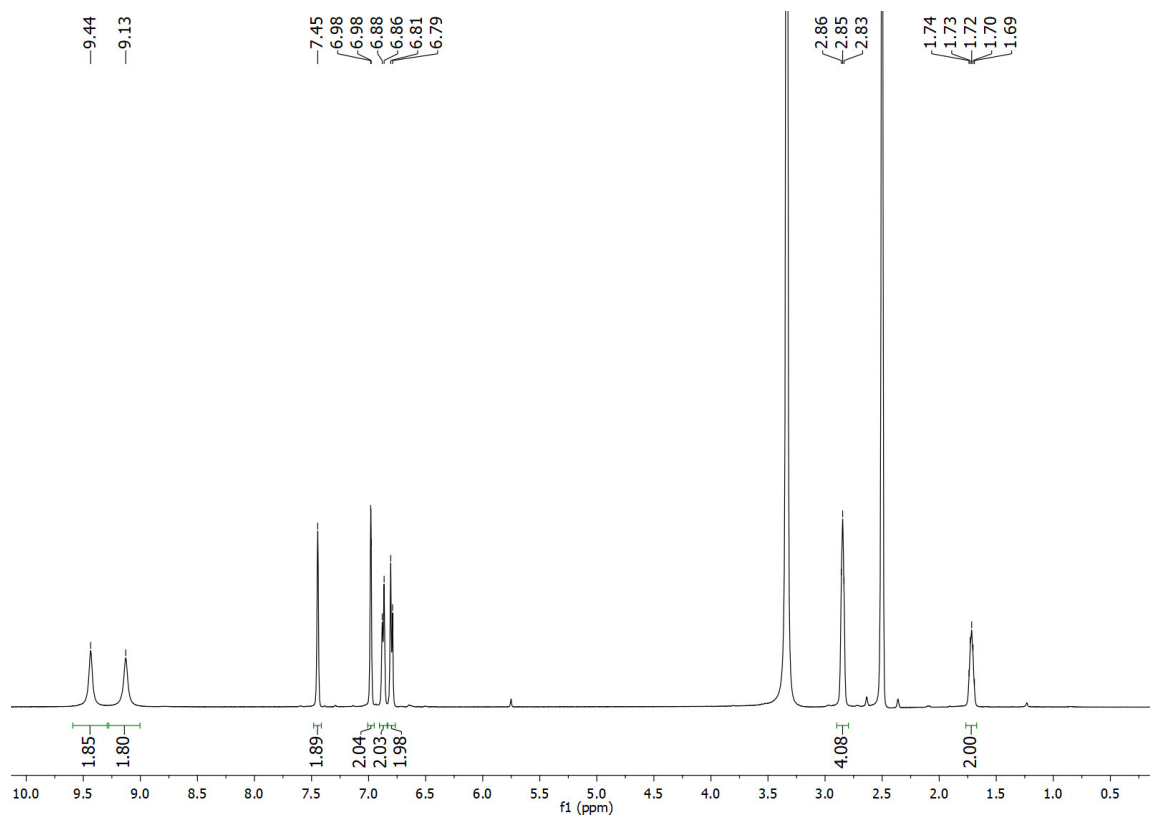



**Figure S9.  $^1\text{H}$  NMR spectrum (500 MHz, DMSO- $d_6$ ,  $\delta$  ppm)**

*(1E,4E)*-1,5-bis(3,4,5-trihydroxyphenyl)penta-1,4-dien-3-one **10**

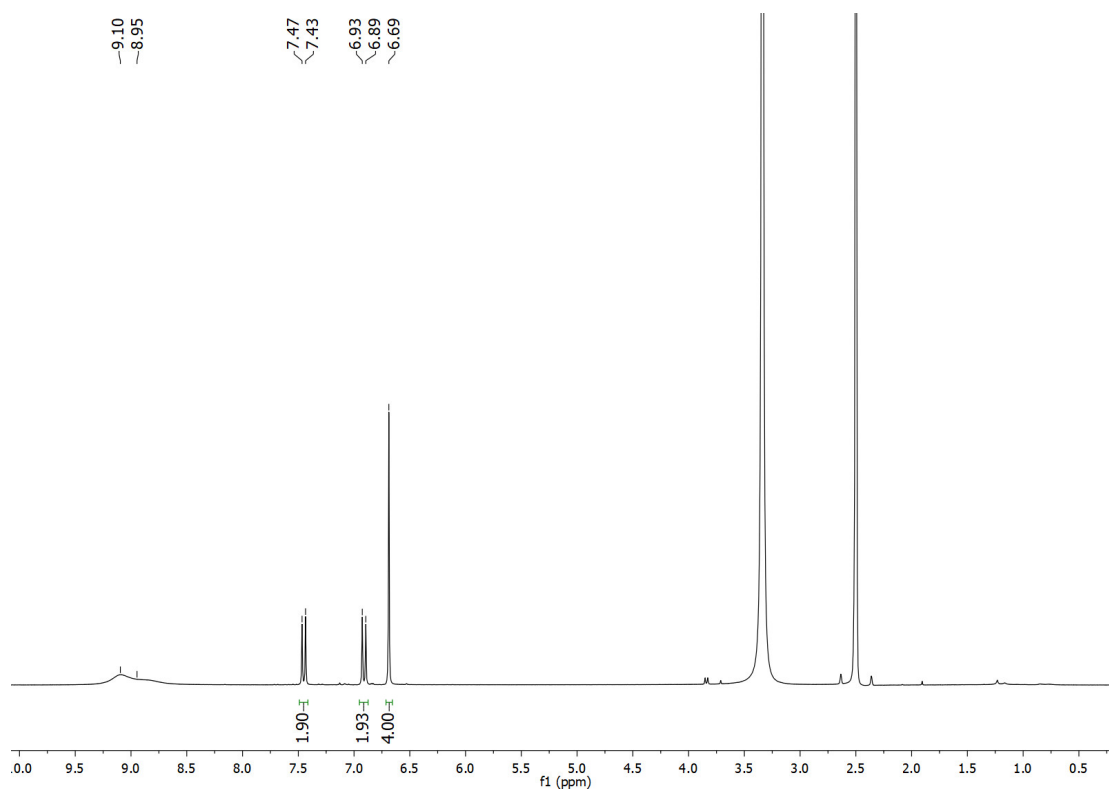

**Figure S10.  $^1\text{H}$  NMR spectrum (500 MHz, DMSO- $d_6$ ,  $\delta$  ppm)**

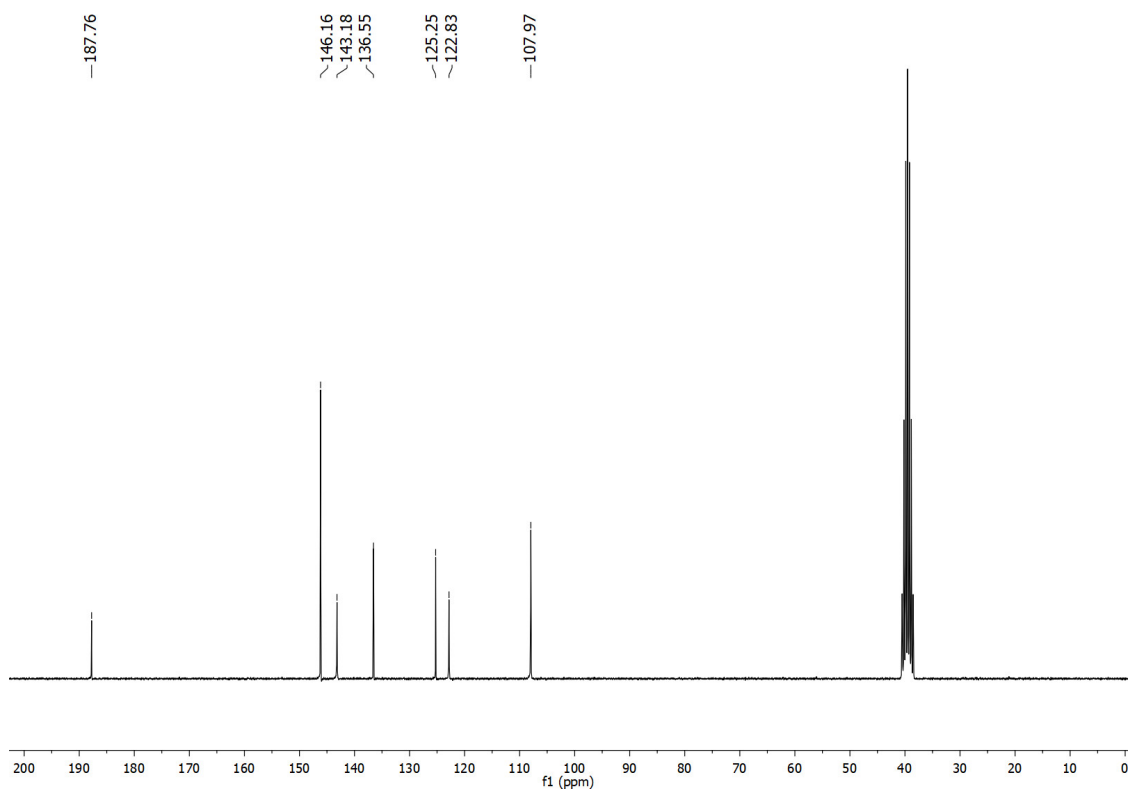

**Figure S11.** <sup>13</sup>C NMR spectrum (62.5 MHz, DMSO-*d*<sub>6</sub>, δ ppm)

*(E)*-4-(3,4-dimethoxyphenyl)but-3-en-2-one **11**

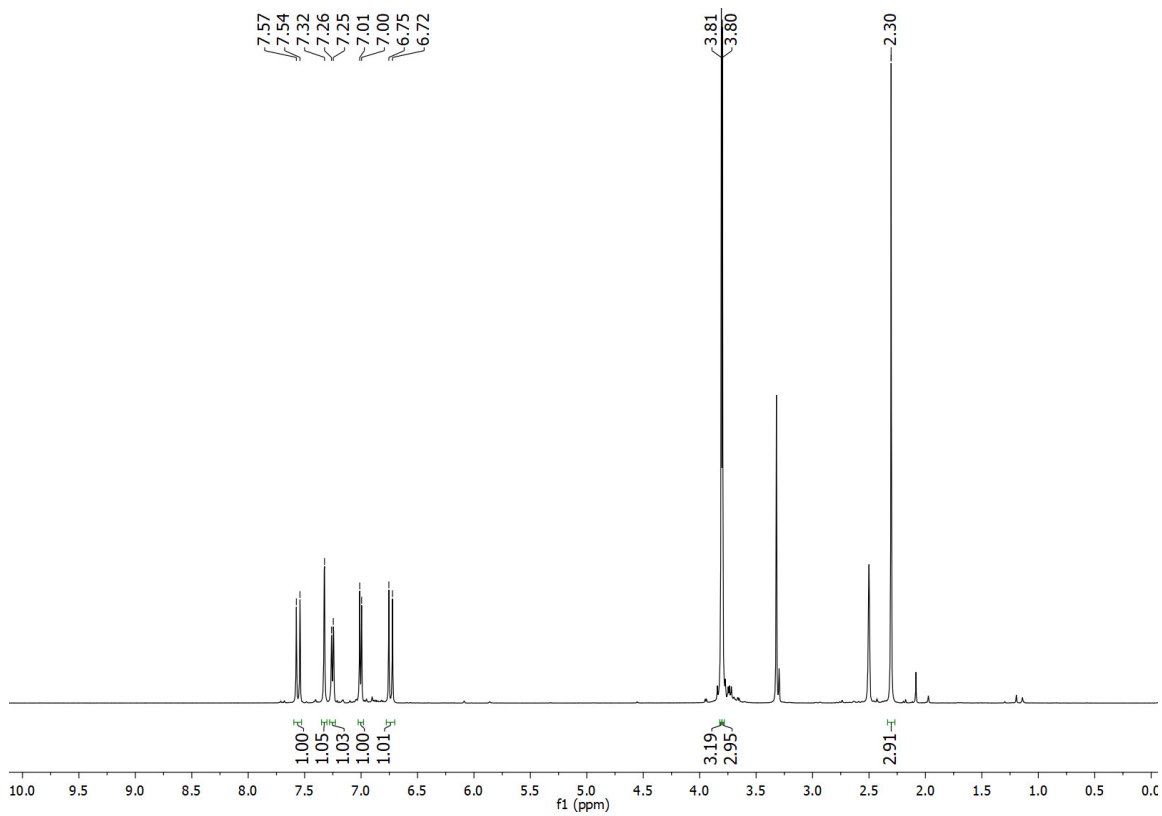

**Figure S12.**  $^1\text{H}$  NMR spectrum (500 MHz,  $\text{DMSO}-d_6$ ,  $\delta$  ppm)

*(E)*-4-(4-hydroxy-3-methoxyphenyl)but-3-en-2-one **15**

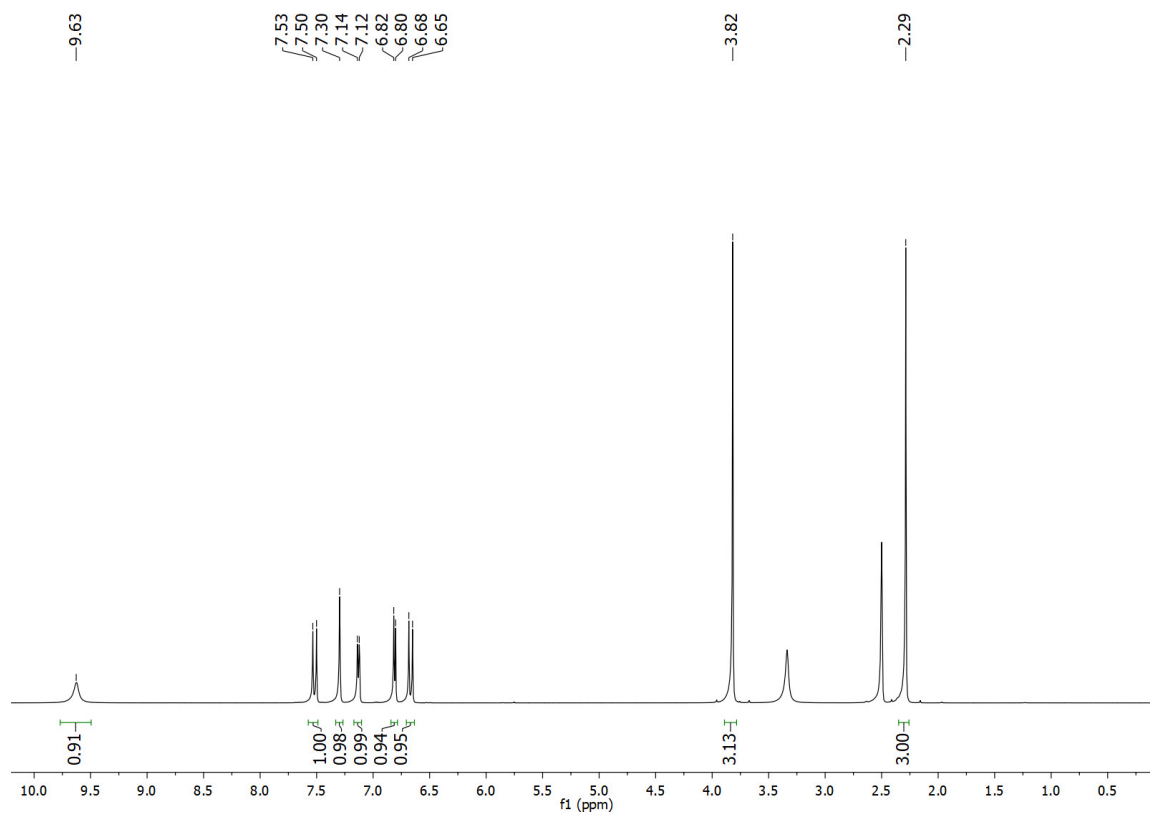

**Figure S13.**  $^1\text{H}$  NMR spectrum (500 MHz,  $\text{DMSO}-d_6$ ,  $\delta$  ppm)

*(E)*-4-(3,4,5-trimethoxyphenyl)but-3-en-2-one **18**

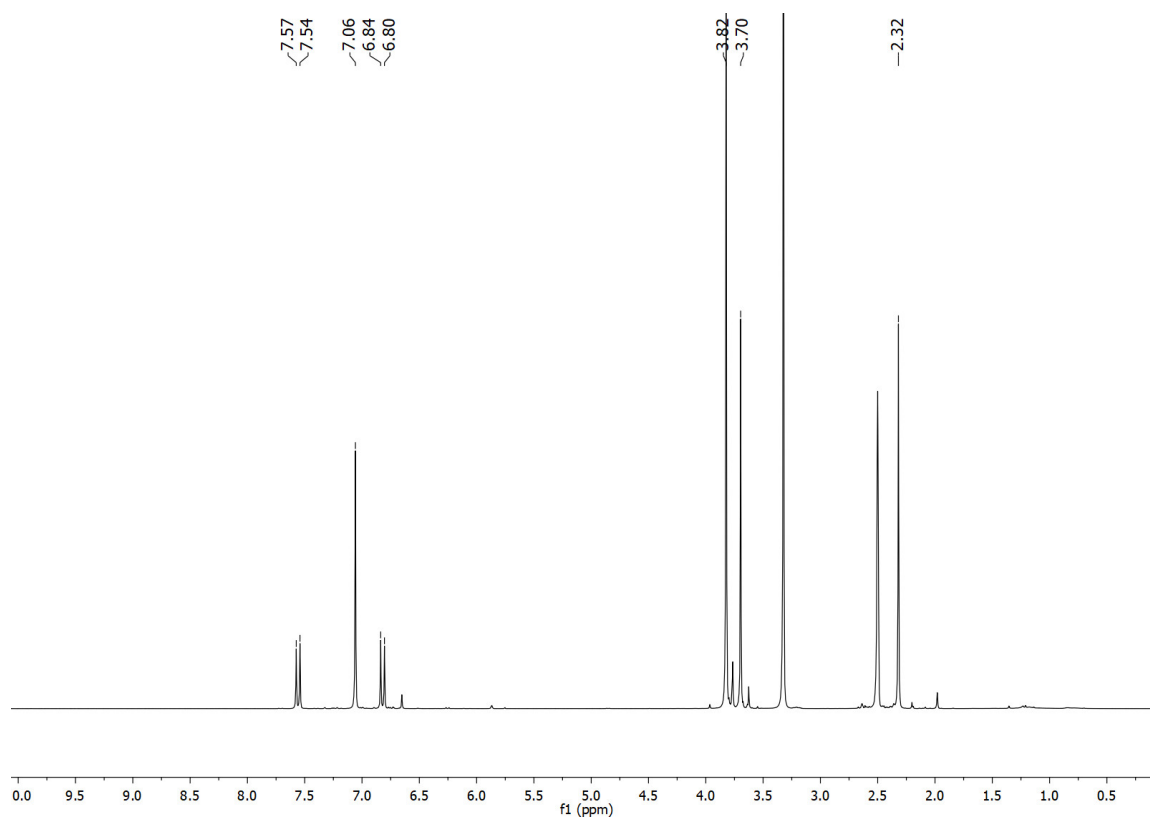

**Figure S14.**  $^1\text{H}$  NMR spectrum (500 MHz,  $\text{DMSO}-d_6$ ,  $\delta$  ppm)

*(1E,4E)*-1-(3,4-dimethoxyphenyl)-5-(4-methoxyphenyl)penta-1,4-dien-3-one **12**

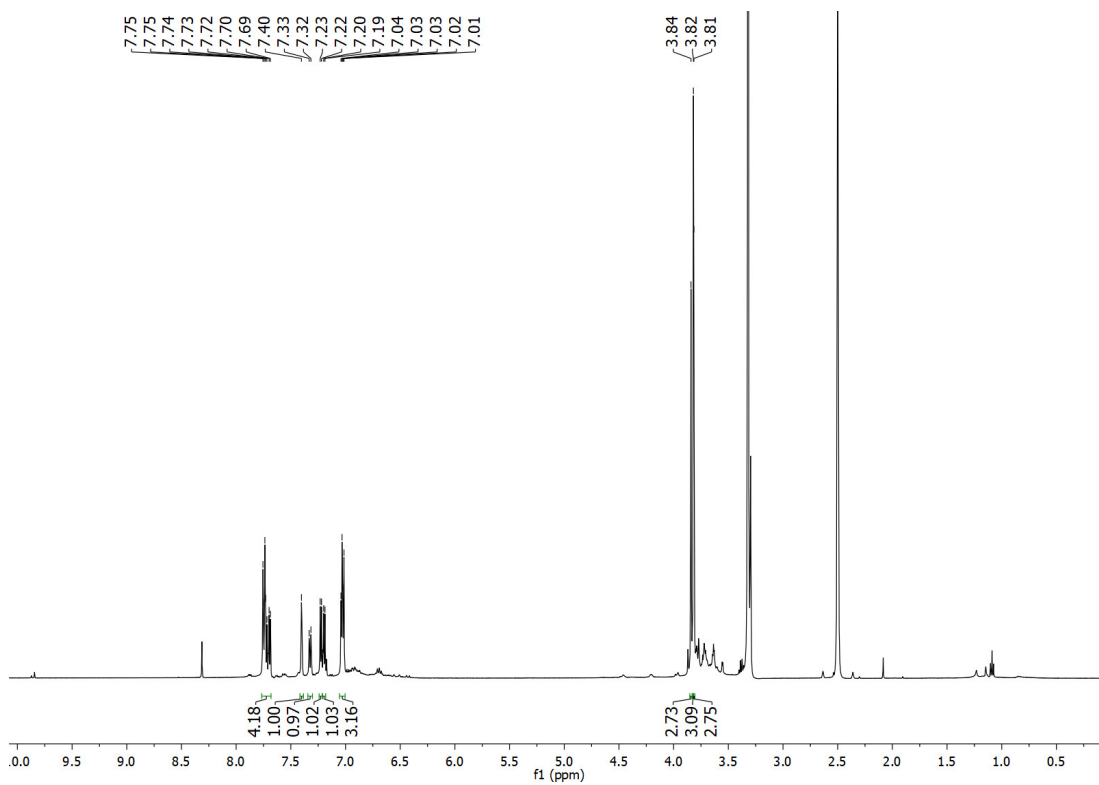

**Figure S15.**  $^1\text{H}$  NMR spectrum (500 MHz,  $\text{DMSO}-d_6$ ,  $\delta$  ppm)

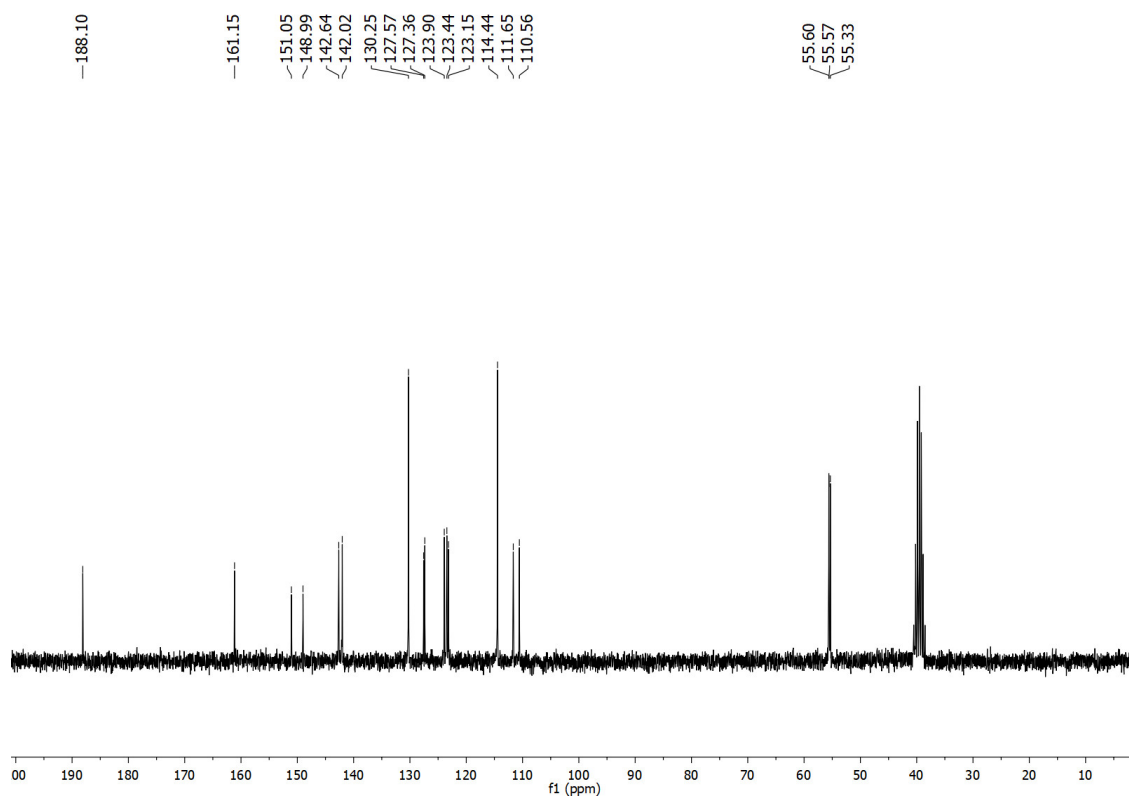

**Figure S16.**  $^{13}\text{C}$  NMR spectrum (125 MHz,  $\text{DMSO-}d_6$ ,  $\delta$  ppm)

*(1E,4E)*-1-(3,4-dihydroxyphenyl)-5-(4-hydroxyphenyl)penta-1,4-dien-3-one **13**

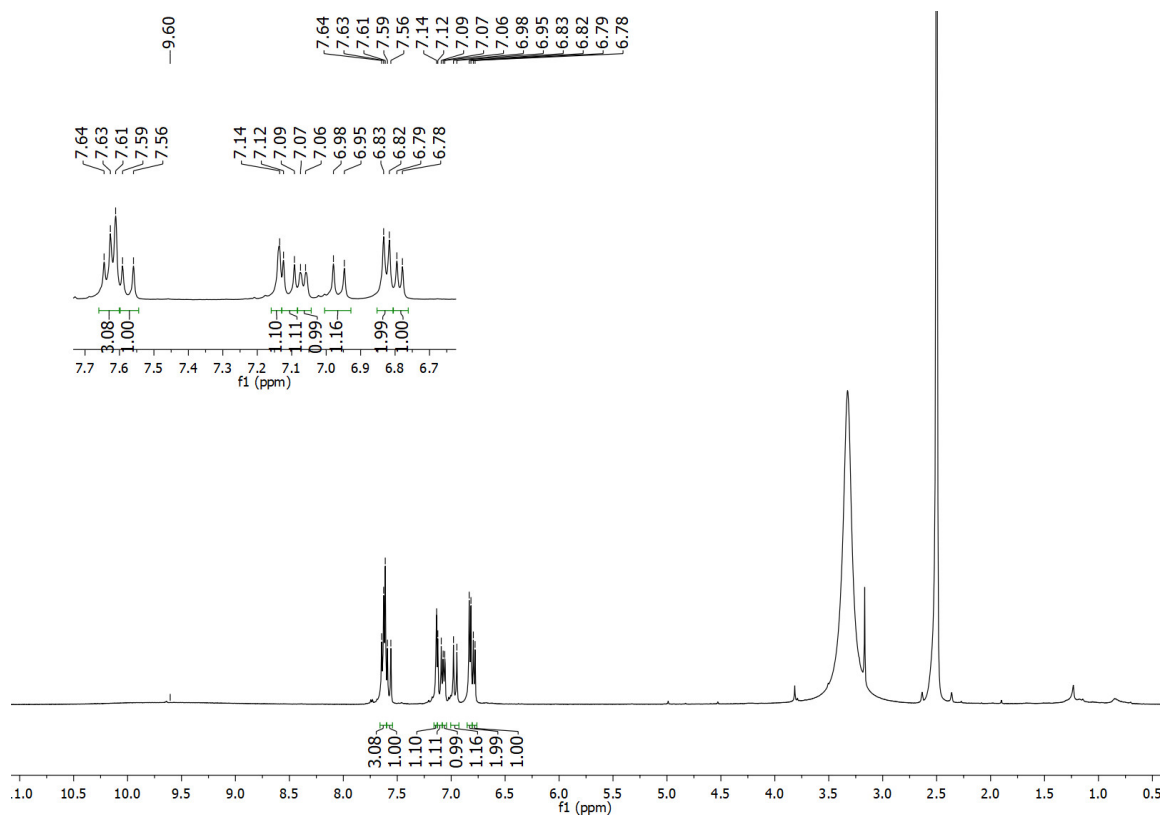

**Figure S17.**  $^1\text{H}$  NMR spectrum (500 MHz,  $\text{DMSO}-d_6$ ,  $\delta$  ppm)

3,4-bis(methoxymethoxy)benzaldehyde **14**

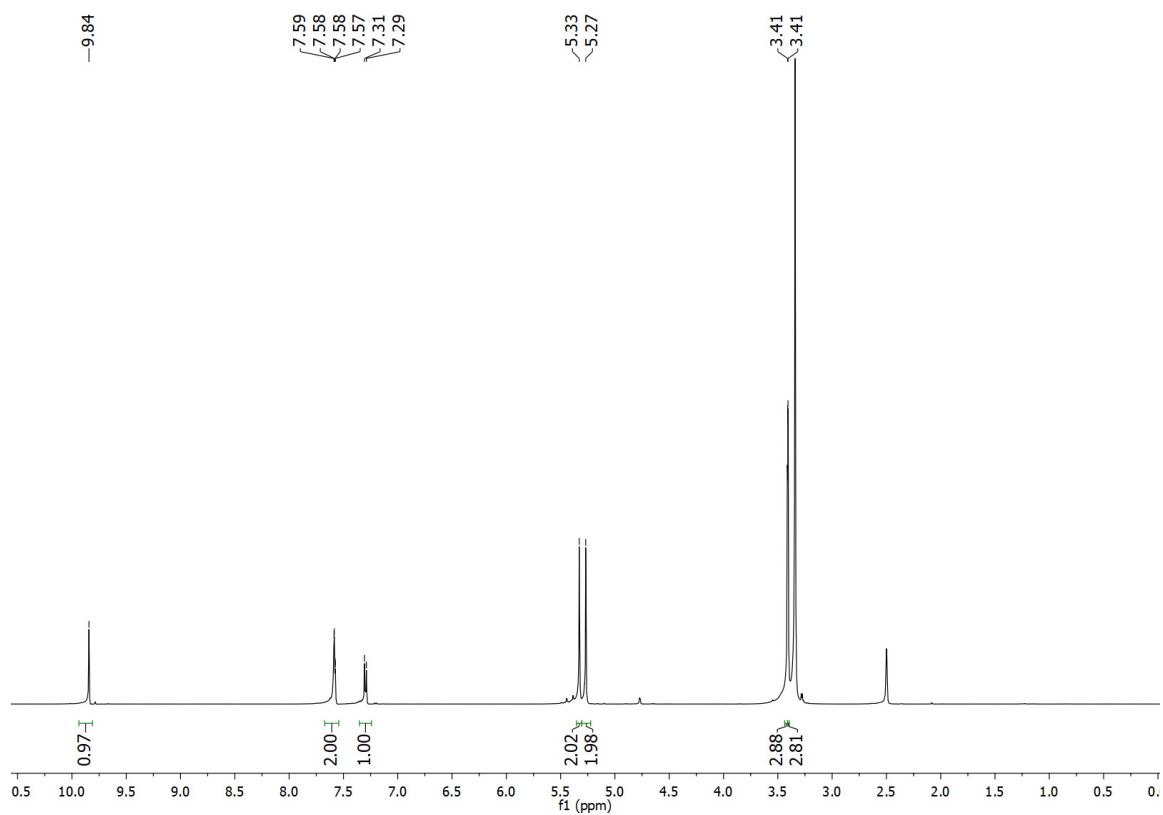

**Figure S18.**  $^1\text{H}$  NMR spectrum (500 MHz,  $\text{DMSO}-d_6$ ,  $\delta$  ppm)

*(1E,4E)*-1-(3,4-dihydroxyphenyl)-5-(4-hydroxy-3-methoxyphenyl)penta-1,4-dien-3-one **17**



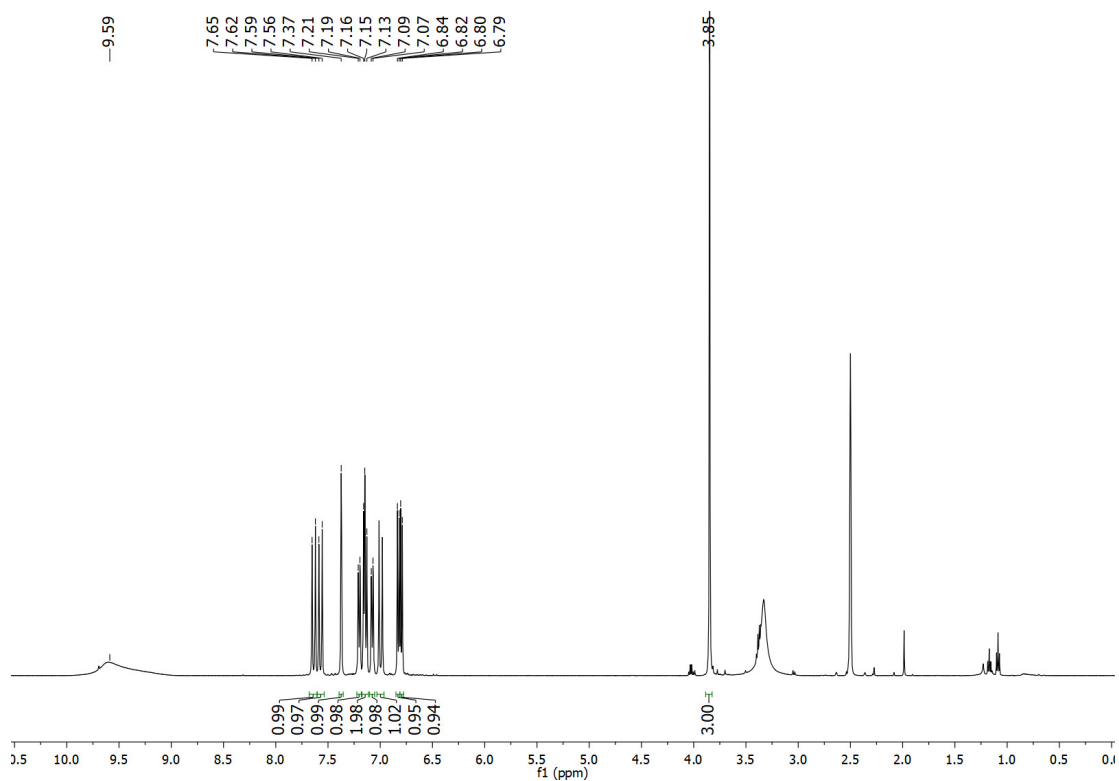

**Figure S19.** <sup>1</sup>H NMR spectrum (500 MHz, DMSO-*d*<sub>6</sub>, δ ppm)

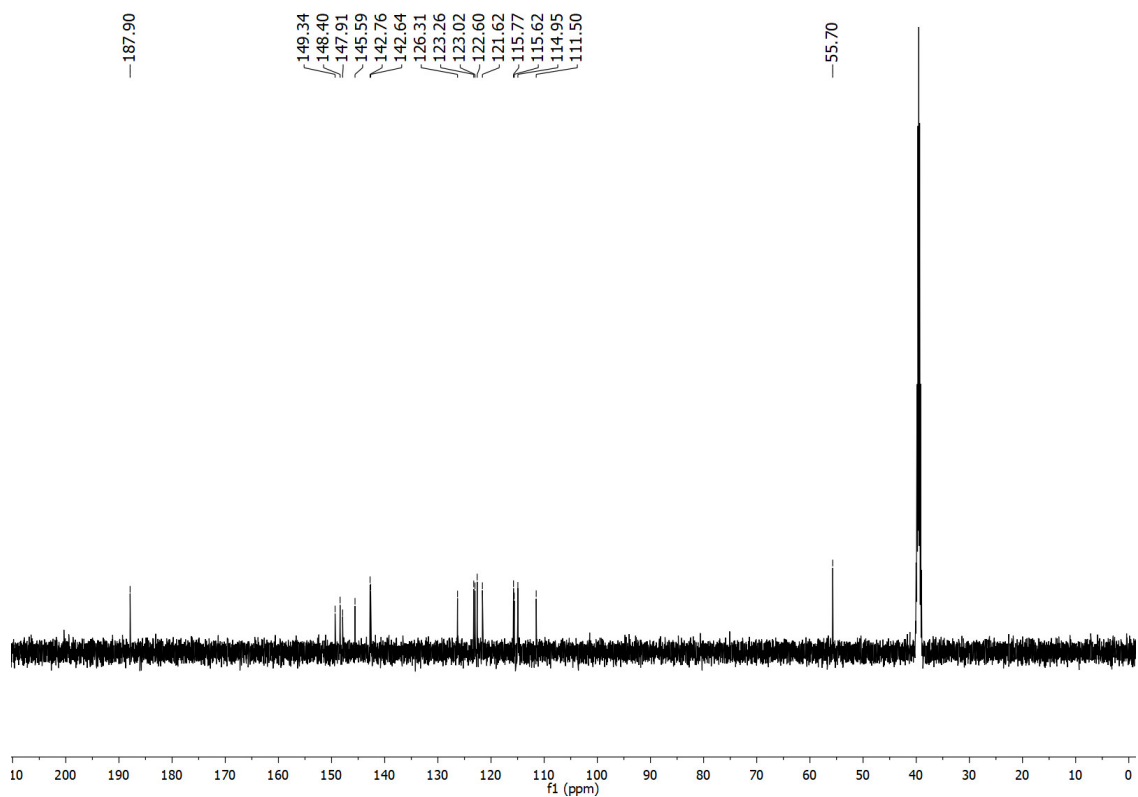

**Figure S20.** <sup>13</sup>C NMR spectrum (125 MHz, DMSO-*d*<sub>6</sub>, δ ppm)

*(E)*-4-(3,4,5-trihydroxyphenyl)but-3-en-2-one **19**

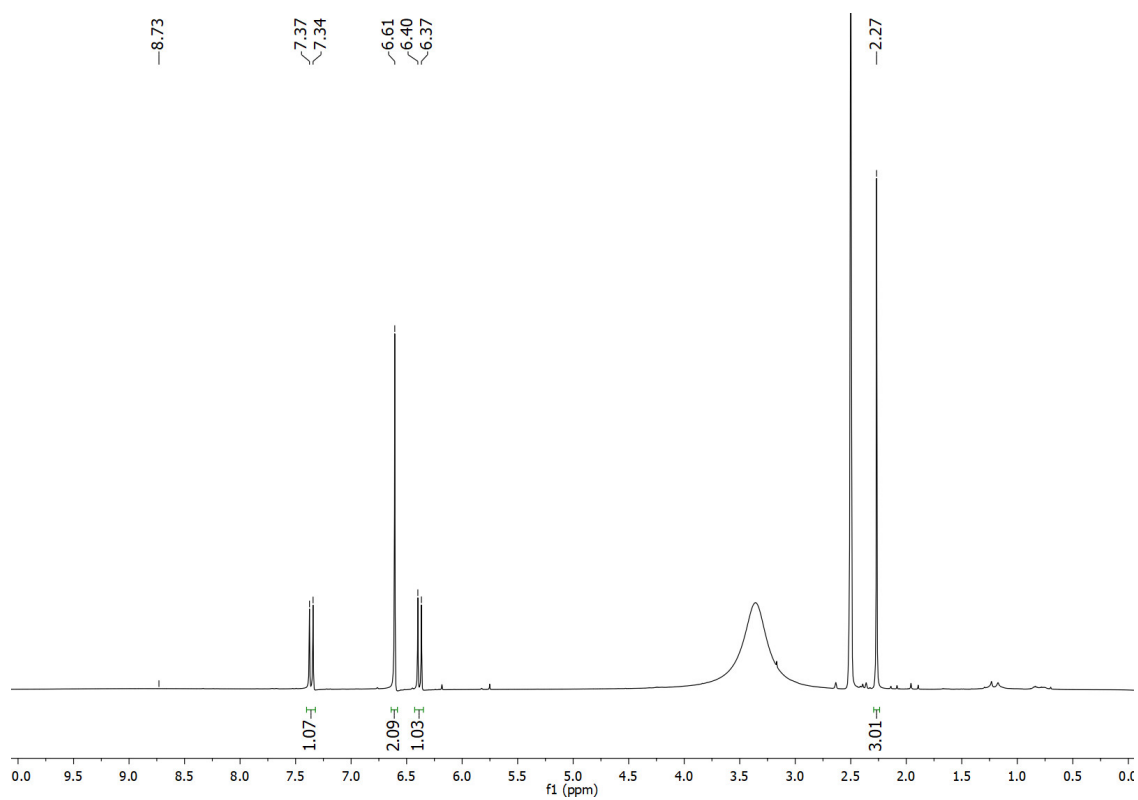

Figure S21. <sup>1</sup>H NMR spectrum (500 MHz, DMSO-*d*<sub>6</sub>, δ ppm)

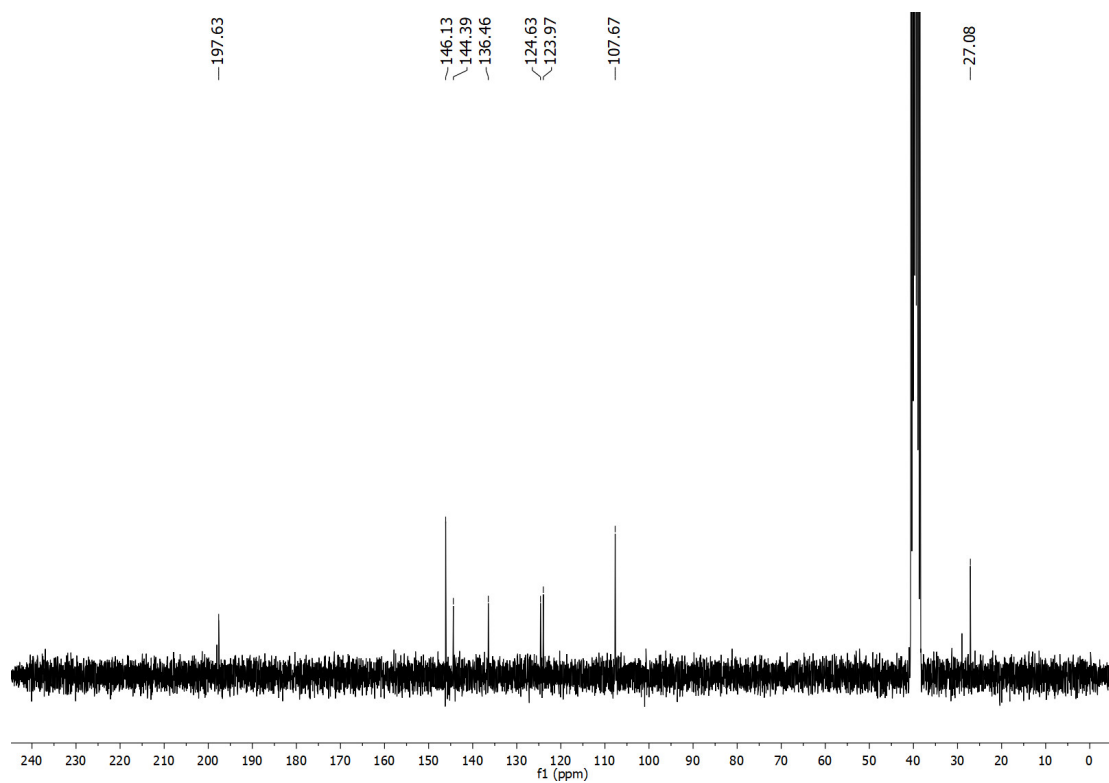

Figure S22. <sup>13</sup>C NMR spectrum (125 MHz, DMSO-*d*<sub>6</sub>, δ ppm)
